1 **The gut microbiota of rural and urban individuals is shaped by**  
2 **geography and lifestyle**

3 Mubanga Hellen Kabwe<sup>1</sup>, Surendra Vikram, Khodani Mulaudzi<sup>1</sup>, Janet K. Jansson<sup>2</sup> and Thulani  
4 P. Makhalanyane<sup>1\*</sup>

5 <sup>1</sup>. Centre for Microbial Ecology and Genomics, Department of Biochemistry, Genetics and  
6 Microbiology, University of Pretoria, Lynwood Road, Hatfield, Pretoria, 0028, South Africa <sup>2</sup>.  
7 Earth and Biological Sciences Directorate, Pacific Northwest National Laboratory, 902 Battelle  
8 Blvd, Richland, Washington 99352, USA

9

10 **Running title:** mycobiome of urban and rural individuals

11

12 \*Address correspondence to Thulani P. Makhalanyane, [thulani.makhalanyane@up.ac.za](mailto:thulani.makhalanyane@up.ac.za)

13

14 **Abstract**

15 Understanding the structure and drivers of gut microbiota remains a major ecological endeavour.  
16 Recent studies have shown that several factors including diet, lifestyle and geography may  
17 substantially shape the human gut microbiota. However, most of these studies have focused on  
18 the more abundant bacterial component and comparatively less is known regarding fungi in the  
19 human gut. This knowledge deficit is especially true for rural and urban African populations.  
20 Therefore, we assessed the structure and drivers of rural and urban gut mycobiota. Our  
21 participants (n=100) were balanced by geography and sex. The mycobiota of these  
22 geographically separated cohorts was characterized using amplicon analysis of the Internal  
23 Transcribed Spacer (ITS) gene. We further assessed biomarker species specific to rural and  
24 urban cohorts. In addition to phyla which have been shown to be ubiquitous constituents of gut  
25 microbiota, Pichia were key constituents of the mycobiota. We found that several factors  
26 including geographic location and lifestyle factors such as the smoking status were major drivers  
27 of gut mycobiota. Linear discriminant and the linear discriminant analysis effect size analysis  
28 revealed several distinct urban and rural biomarkers. Together, our analysis reveals distinct  
29 community structure in urban and rural South African individuals. Geography and lifestyle  
30 related factors were shown to be key drivers of rural and urban gut microbiota.

31

## 32 **Importance**

33 The past decade has revealed substantial insights regarding the ecological patterns of gut  
34 microbiomes. These studies have shown clear differences between the microbiomes of  
35 individuals living in urban and rural locations. Yet, in contrast to bacteria we know substantially  
36 less regarding the fungal gut microbiota (mycobiome). Here we provide the first insights  
37 regarding the mycobiome of individuals from urban and rural locations. We show that these  
38 communities are geographically structured. Further we show that lifestyle factors, such as diet  
39 and smoking, are strong drivers explaining community variability.

40

## 41 **Introduction**

42 By comparison to prokaryotes (bacteria and archaea), eukaryotes are considered part of the rare  
43 “biosphere” of the gut (1, 2). Despite their low abundances, fungi play significant roles in host  
44 physiology (2-5). Recent studies have shown that the gut fungal community composition is less  
45 stable over time, compared to bacterial communities (4, 6, 7). These studies suggest that the gut  
46 mycobiota is more variable than bacterial communities, and may be influenced substantially by  
47 environmental factors (3, 7). Despite evidence confirming the gut microbiota is diverse and  
48 interacts with the host immune system (3, 8, 9), knowledge regarding the community structure of  
49 healthy human gut mycobiota remains scant.

50 Most studies have focused on the potential roles played by the mycobiota in the aetiology of gut  
51 diseases (10-12). These studies have provided crucial insights on the role of the mycobiota as a  
52 potential drivers of immunological disorders and as opportunistic pathogens in  
53 immunocompromised hosts (13). Further, dysbiosis of gut mycobiota has been linked to obesity,  
54 colorectal cancer and Inflammatory Bowel Diseases (IBDs) (12, 14, 15). Decreased abundances  
55 of *Saccharomyces cerevisiae* and higher proportions of *Candida albicans* were found in IBD  
56 patients compared to healthy controls. A recent study showed that Crohn’s disease-specific gut  
57 environments may select for fungi to the detriment of bacteria suggesting disease-specific inter-  
58 kingdom network alterations in IBD (12). Yet, despite these beneficial effects, there remains a  
59 clear deficit in knowledge regarding the precise role played by the gut mycobiota in disease  
60 prevention. Relatedly, the factors which drive the diversity and community structure of gut  
61 mycobiome remain underexplored. Assessing the influence of environmental factors on the gut  
62 mycobiome across a wider cohort of participants is crucial for determining the effects on host-  
63 microbiota dynamics and health.

64 Several studies have evaluated the effects of age (16-18), gender (17), diet (19), diabetes and  
65 obesity (15, 20, 21), anorexia nervosa (22), differences across body sites (23, 24) and  
66 geographical locations (6, 25, 26) on mycobiome composition and diversity. Yet, these studies  
67 are mostly disease centric or focussed on Asian (26) and/or Western populations (6, 7, 19). To  
68 our knowledge, only one study has investigated the gut eukaryotic diversity of African  
69 individuals (27). Although these studies improved our understanding of the mycobiome, there  
70 may be several confounding factors such as genetic differences. These differences make it  
71 difficult to assess, for instance, the effects of living in urban or rural areas on the microbiome.  
72 The effects of diet, geographic locality and lifestyle, on the gut microbiome are often assumed  
73 but rarely examined. Where these relationships are assessed, the majority of studies have  
74 primarily focused on the ecologically abundant bacteria (28, 29) with assertions that their  
75 patterns will likely hold for other taxa, including mycobiomes.

76 Here, we applied amplicon sequencing of the fungal internal transcribed spacer (ITS) of the  
77 rRNA gene on samples collected from individuals living in urban and rural areas in Africa. We  
78 provide the first insights regarding the drivers of mycobiome community structure and potential  
79 biomarkers specific to individuals from urban and rural locations. Previous studies of the gut  
80 mycobiome have primarily investigated small cohorts with fewer than 20 individuals (25, 30, 31)  
81 with very few studies investigating larger cohorts (6, 32). This study represents the first analysis  
82 of the faecal mycobiota in a large cohort of healthy sub-Saharan individuals (100 volunteers).  
83 Furthermore, this is the first study which compares the composition and diversity of the gut  
84 mycobiome of geographically separated non-western individuals with the same ethnicity. We  
85 further explored potential biomarker taxa in urban and rural individuals and explore how these  
86 taxa vary between the two areas. Using extensive predictor variables collected from participants,

87 we show that geography and lifestyle structure the gut mycobiome of rural and urban South  
88 African individuals.

89

## 90 **Results**

### 91 **Similarities and differences between urban and rural individuals**

92 We assessed the faecal mycobiota of South African adults living in rural ( $n=50$ ) and urban  
93 regions ( $n= 50$ ) by assessing stool samples (see details regarding sample recruitment in  
94 Methods). We recruited an equal number of male and female volunteers across two villages in  
95 the Limpopo region of South Africa, which is located roughly 500km from the urban site  
96 (Pretoria) (**Figure 1a**). To gain insights regarding predictive variables which may shape the gut  
97 microbiome, detailed questionnaires were distributed to all volunteers. The volunteers from Ha-  
98 Ravele and Tshikombani villages (population size of roughly 200,000, representing the rural  
99 participants) were on average 24 years (mean  $\pm$  6.3). Volunteers from Pretoria (total population  
100 of approximately 2.1 million) were on average 31 years (mean  $\pm$  9.1). The BMI of all  
101 participants was above 26.45, resulting in a cohort of individuals classified as obese, less than  
102 15.9% of participants were smokers.

103 Amplicon sequence data from 95 volunteers (samples from 5 rural volunteers were excluded due  
104 to low quality reads) generated 5,936,454 raw reads. A total of 5,414,023 fungal reads were  
105 retained after sequence filtering and chimera removal. Of these, 1,636,180 reads were assigned  
106 to OTUs and these were further clustered into 1,911 OTUs using a 97% cut-off. A higher  
107 proportion of fungal OTUs were unique to location with urban and rural samples accounting for  
108 47.9% and 45.3% of reads, respectively (**Supplemental Figure 1a**).

109 After random subsampling to the lowest read count, 155 OTUs were excluded from further  
110 analyses. The resulting accumulation curves showed reasonable sequence saturation, at a  
111 regional level (**Supplemental Figure 1b**). Fungal species richness was significantly higher in the  
112 stool samples of rural volunteers (Observed;  $W = 615.5$ ,  $p$ -Value =  $1.471e4$ ) compared to urban  
113 volunteers (**Figure 1b**). However, we did not find significant differences in richness based on  
114 gender and age group.

### 115 **Two ubiquitous fungal phyla in urban and rural locations**

116 Overall, four distinct fungal phyla were detected in urban and rural gut mycobiomes, based on  
117 sequences with relative abundances above 0.1% (**Figure 1c**). The majority of sequences were  
118 assigned to members of the phyla *Ascomycota* and *Basidiomycota*, that constituted 80.7% and  
119 6.1% of the total relative abundance, respectively. Unknown sequences constituted 12.9% of the  
120 fungal mycobiome. In total, 13 distinct fungal classes were identified with *Saccharomyces*  
121 constituting the majority of sequences (50.1%) followed by *Dothideomycetes* (20.3%),  
122 *Eurotiomycetes* (4.8%) and *Sordariomycetes* (3.9%). Unknown fungal genera dominated our  
123 cohort (18.4%), followed by *Pichia* (17.6%) *Candida* (17.1%) and *Cladosporium* (5.9%).  
124 However, no significant difference was found between taxa abundance at the class level for the  
125 gut mycobiota of rural and urban participants ( $W = 1054$ ,  $p$ -value = 0.5992). The difference  
126 between the gut mycobiota of rural and urban individuals, across the two locations, was not  
127 statistically significant (Kruskal-Wallis chi-squared = 2.9875,  $df = 3$ ,  $p$ -value = 0.3936).

128 To assess the degree of uniqueness of a given sample in relation to the overall community  
129 composition, we assessed the local contribution to beta diversity (LCTBD). We found that  
130 samples from urban volunteers contributed a greater fraction of the overall community diversity  
131 ( $p$ -Value < 0.05). Samples with high local contribution to beta diversity (LCTBD) had a high

132 abundance of *Basidiomycota* and other unknown taxa. In contrast, only two samples from the  
133 rural location contributed to overall community diversity (**Supplemental Figure 1c**).

#### 134 **Distinct mycobiota among urban and rural volunteers unrelated to gender**

135 Differences in the fungal community structure between the rural and urban localities were  
136 visualized in an NMDS plot (**Figure 2a**). Urban and rural samples formed distinct clusters  
137 [PERMANOVA ( $R^2 = 0.070$ ;  $p$ -Value = 0.0001), ANOSIM ( $R = 0.43$ ,  $p$ -Value = 0.001) and  
138 ADONIS ( $R^2 = 0.07034$   $p$ -Value = 0.0001)]. However, male and female samples did not cluster  
139 separately. Pairwise analysis of permutational multivariate analysis of variance (PERMANOVA)  
140 showed that there was no significant difference between female vs male urban, and female vs  
141 male rural individuals ( $R^2 = 0.018$ ;  $R^2 = 0.023$ ; respectively and  $p$ -Value > 0.4 for both).  
142 However, there was a significant difference between the gut mycobiota of urban versus rural  
143 female and male participants ( $R^2 < 0.074$  for all;  $p$ -Value = 0.001 for all).

#### 144 **Ecological drivers of gut mycobiota**

145 Redundancy analysis (RDA) was performed to determine which predictor variables significantly  
146 explained the variation in fungal community composition (**Figure 2b**). Four predictive variables  
147 were significant ( $r^2 > 0.2$ ;  $p$ -Value < 0.05) drivers of community composition and structure.  
148 Predictive variables included; breastfeeding, smoking, mode of birth and location; all of which  
149 significantly influenced the fungal community composition.

150 We conducted correlation analyses to explore the relationships among dominant gut species. Our  
151 results showed a few highly positive correlations in the rural cohort: between *Mucor* and  
152 *Dipodascus*, *Mucor* and *Naganishia*, *Clavispora* and *Lentendrea*, and between *Udeniomyces* and  
153 *Lentendrea* (**Figure 4a**). Whereas, the strongest negative correlation was found between



154 *Dipodascus* with *Trichoderma*, *Dipodascus* with *Ascotricha* and *Dipodascus* with  
155 *Chalastospora*. Within the urban cohort, *Xeromyces* and *Agaricus*, *Diutina* and *Clavispora*, and  
156 *Dekkera* and *Diutina* exhibited the strongest positive correlations (**Figure 4b**). The strongest  
157 negative correlations were detected between *Clavispora* with *Filobasidium*, and with *Verrucaria*  
158 and *Malassezia*.

### 159 **Biomarker taxa**

160 Linear discriminant analysis (LDA) and the linear discriminant analysis effect size (LEfSe) (33)  
161 test for biomarkers was used to detect taxa that showed the strongest effect on group  
162 differentiation (**Figure 3a**). OTU level analysis uncovered 14 urban-associated species from 10  
163 genera. Whereas, 17 rural-associated species from 11 genera, were detected as possible  
164 biomarkers. The most abundant rural-associated biomarker genera were *Hypopichia* and  
165 *Dipodascus*, with species *Hypopichia burtonii* and *Dipodascus geotrichum* being the most  
166 abundant (**Figure 3b**). Whereas, the urban-associated biomarkers were dominated by the class  
167 *Tremellomycetes* and genera *Dekkera* and *Hannaella*. Whereas, species *Dekkera bruxellensis*  
168 and *Hannaella sinensis* dominated the urban-associated biomarkers.

### 169 **Discussion**

170 The results from this study suggest that the gut mycobiome of the South African population is  
171 structured by geography and lifestyle. This finding is supported by the clustering of a large  
172 proportion of the fungal OTU's into discrete rural and urban groups within the Venn diagram.  
173 Only a small percentage of OTUs were shared between the two populations, which may suggest  
174 that factors such as the environment, age and diet may play a role in shaping the differences in

175 OTU clustering. These results were further corroborated by two distinct clusters, consistent with  
176 rural and urban locality.

177 Several studies have investigated the healthy human mycobiome (6, 7, 19, 25, 30, 34). In these  
178 studies, geography was not considered as a potential factor structuring the gut mycobiota. For  
179 instance, Nash et al. (2017) found no association between host phenotypic characteristics with  
180 mycobiome profile. This study suggests that diet, the environment, diurnal cycles, and host  
181 genetics may substantially influence the human gut mycobiome. However, the finding that the  
182 majority of the variation could not be explained by their metadata does suggest that other  
183 environmental factors, such as geography, may contribute to structuring the human microbiome  
184 (6).

185 Our study provides the first results showing the importance of geography in African populations.  
186 Geographic locality may be associated with different environmental factors, such as different  
187 climatic regimes, which may effect structural changes in the mycobiota. For example, climate  
188 significantly influences vegetation and farming practices and leads to region specific diets. These  
189 region-specific diets may ultimately influence the gut mycobiota. This is a reasonable prediction  
190 given previous findings showing that fungi have climate dependent biogeographic patterns (35,  
191 36). These patterns are likely to determine the type of fungi individuals may be exposed to,  
192 which may in turn impact the colonization of fungi in the human gut. The most abundant rural-  
193 associated biomarker species found in this study, *Dipodascus geotrichum*, is ubiquitous in nature  
194 (37) whereas, *Hypopichia burtonii* is commonly isolated from corn, wheat, and rice (38). The  
195 urban-associated biomarkers were dominated by the species *Dekkera bruxellensis*, which are  
196 commonly isolated from fermented food such as wine, beer, feta cheese and sour dough (39-41).  
197 In contrast, *Hannaella sinensis* is commonly isolated from plants and soil (42, 43). The staple

198 diet of the rural South African population primarily consists of a corn-based porridge (called  
199 ‘pap’). It is therefore not uncommon for a fungal species commonly isolated from corn to be a  
200 dominant biomarker for the rural population. Conversely, the urban population diet was more  
201 diverse and included fermented foods such as wine, sour dough bread and feta cheese, which are  
202 commonly available in supermarkets. Thus, the species *Dekkera bruxellensis* was identified as a  
203 dominant biomarker in the urban population.

204 In addition to geographic location, we found that smoking, mode of birth and breastfeeding  
205 significantly influenced gut fungal communities. Several studies have previously reported that  
206 these factors may significantly influence the initial colonization, subsequent composition and  
207 structure of bacterial members of the human gut microbiome (28, 44-46). Suhr et al. (2016) and  
208 Hallen-Adams et al. (2017) investigated the gut mycobiome of two cohorts that were exclusively  
209 on a vegetarian or a western diet. These studies found that the distribution of fungi differed  
210 considerably between the two cohorts (7, 47). Plant-associated *Fusarium*, *Malassezia*,  
211 *Penicillium* and *Aspergillus* species were detected at higher abundances within the vegetarian  
212 cohort, compared to the cohort on a conventional diet. The finding that smoking affected fungal  
213 community composition and structure is supported by several studies (48-50). The  
214 approximately 4000 chemical compounds produced by cigarettes have been shown to alter the  
215 composition of the gut microbiome (48, 50-53). The reported increase of *Clostridia* induced by  
216 smoking in murine models has also been indirectly confirmed in humans where an increased rate  
217 of *C. difficile* infection was greater in former and current smokers compared to never smokers  
218 (52). Moreover, the abundance of the fungus *Candida tropicalis* has also been reported to be  
219 significantly higher in *C. difficile* infection patients compared to healthy individuals. (54). The  
220 abundance of *C. tropicalis* has also been detected to be positively correlated with levels of anti-

221 *Saccharomyces cerevisiae* antibodies (ASCA) (54). In our study *C. tropicalis* was detected to be  
222 higher in individuals who smoke compared to non-smokers whereas, the inverse was true for *S.*  
223 *cerevisiae*. These findings may confirm the antagonistic association between the species *C.*  
224 *tropicalis* and *S. cerevisiae*, as previously reported by Hoarau et al., (2016).

225 Most studies have identified the genera *Candida*, *Saccharomyces*, *Malassezia* and *Aspergillus* as  
226 the three most abundant in the gut of healthy individuals (6, 25, 32). To the best of our  
227 knowledge, our study is the first to report *Pichia* as one of the top four most abundant genera in  
228 the human gut mycobiome. This may be due to several factors including differences in cohort  
229 characteristics (e.g., geographical location, diet, genetic predisposition and climate). *Pichia* have  
230 been identified as both constituent members of the human oral (55, 56) and gut microbiome (34).  
231 Mukherjee detected a 1:1 abundance ratio in the oral mycobiome of individuals when *Candida*  
232 and *Pichia* were present together (56). *Pichia* was also observed to have an antagonistic effect  
233 against *Candida*, *Fusarium* and *Aspergillus*.

234 The yeast genera, *Pichia*, *Candida* and *Cladosporium*, dominated the South African gut  
235 mycobiome. Our findings agree with previous studies which show that members of the  
236 *Aspergillus*, *Candida*, *Debaryomyces*, *Malassezia*, *Penicillium*, *Pichia*, and *Saccharomyces*  
237 genera were the most recurrent and/or dominant fungal genera (34, 47, 57). In contrast to  
238 previous findings, our data indicate higher relative abundances of *Cladosporium*, detection of  
239 *Mucor* and the absence or low abundance of genera such as *Cyberlindnera*, and *Galactomyces*  
240 (6, 19, 58). Previous studies found that the gut mycobiome of a cohort from Houston, Texas, was  
241 dominated by *Saccharomyces*, *Malassezia* and *Candida* (6). By contrast, the genus *Malassezia*  
242 was not detected in the gut mycobiome of a Pennsylvania cohort, which was instead dominated  
243 by the genera *Saccharomyces* and *Candida* (19). Differences in study methodologies may be a

244 source of these conflicting findings (6). One study amplified the Internal Transcribed Spacer 2  
245 (ITS2) region of the fungal rRNA gene (6), and the second amplified the ITS1 region (19).  
246 Studies similar to the work by Gardes et al. (1993) and White et al. (1990), where ITS1F and  
247 ITS2 primer sets were used to amplify the ITS2 region, did not detect *Malassezia* (59, 60). The  
248 second reason for the observed differences has been attributed to differences in cohort  
249 characteristics, such as diet and/or geographical location. Strati (2016) and Raimondi's (2019)  
250 investigating cohorts in Italy, detected same dominant fungal genera (58, 61), and the  
251 investigation of cohorts in two different states in the USA observed different results (6, 46). We  
252 used ITS1 and ITS4 in this study and found that the genera *Pichia*, *Candida* and *Cladosporium*  
253 dominated the urban cohort, whereas genera *Pichia*, *Candida* and *Aspergillus* dominated the  
254 rural cohort. The dominant taxa identified in urban and rural locations further support our  
255 assertion that geographic location plays a major role in the observed differences.

256 *Candida albicans* was the most dominant taxon in our cohort and is frequently reported as the most  
257 abundant *Candida* species in both diseased (62) and healthy individuals (63). *Candida* spp. not  
258 only colonize the gut (19, 34) but several other body sites, including the oral cavity (55, 64),  
259 vagina (65), and skin (66, 67). However, *Candida* are autochthonous to the mammalian digestive  
260 tract and species including *Candida albicans*, *C. tropicalis*, *C. parapsilosis*, and *C. glabrata* may  
261 grow and colonize at 37°C (7). A review of the literature suggest that *C. albicans* carriage in  
262 healthy individuals ranges from 30–60% (68) and that living mammals are considered a niche for  
263 these species as they are not found in significant concentrations in soil, food or air (69, 70).  
264 Raimondi et al., (2019) reported that *C. albicans* was frequently detected and dominated the  
265 cultivable mycobiota of different faecal samples (61).

266

## 267 **Conclusions**

268 This study provides the first insight into the importance of geography and lifestyle factors on the  
269 gut mycobiome in rural and urban locations in Africa. We found that fungi in the gut display  
270 distinct patterns consistent with geographic locality. Redundancy analysis showed that several  
271 lifestyle factors were major drivers explaining the distinct community structure. The results of  
272 biomarker analysis revealed several ecologically important fungal taxa, which were unique to  
273 individuals from urban and rural areas. These results have significant health implications,  
274 particularly for immunocompromised individuals living in rural and urban locations. Such  
275 findings provide a valid basis for the development of novel therapeutics or preventative measures  
276 reliant on modulating the gut mycobiome.

277

## 278 **Methods**

### 279 **Ethical clearance**

280 All experiments were approved by the Ethics Approval Committee of the Faculty of Health  
281 Sciences at the University of Pretoria (EC 160630-051). Participants approved and provided  
282 informed consent prior to enrolment in this study. All experimental methods and experiments  
283 were in accordance with the Helsinki Declaration.

### 284 **Participant enrolment criteria for urban and rural areas**

285 Volunteers were recruited from two rural locations and one urban location. For rural volunteers,  
286 we recruited individuals following traditional diets, with generally low levels of processed foods.  
287 Urban cohorts reported mixed diets and increased consumption of processed foods. Volunteers

288 from the Ha-Ravele and Tshikombani villages located in the Vhembe District of the Limpopo  
289 Province comprised the rural cohort. Both villages are approximately 391 km and 439 km,  
290 respectively, from the closest city (Pretoria). This city, in the Gauteng province of South Africa,  
291 served as the urban sampling area (Figure 1a). In total, 100 stool samples were collected from  
292 healthy volunteers. These samples were equally divided between gender and locality [i.e. rural  
293 (25 males and 25 females) and urban (25 males and 25 females)]. Self-stool collection kits were  
294 provided to all volunteers (Easy Sampler® Stool collection Kit, Hounisen Lab Equipment A/S,  
295 Skanderborg, Denmark).

#### 296 **Inclusion and exclusion criteria**

297 The participants were all healthy adults age 18 – 50 years. Volunteers reporting antibiotic  
298 use/other treatments in the sample collection sheets were excluded from the study. Similarly,  
299 individuals who had been diagnosed with any inflammatory-related bowel diseases or  
300 gastrointestinal diseases within six months prior to sample collection were excluded from the  
301 study.

#### 302 **DNA extraction**

303 DNA was isolated using the PowerSoil DNA Isolation Kit (MO BIO Laboratories Inc., Carlsbad,  
304 CA) following the manufacturer's specifications with minor modifications. Briefly,  
305 approximately 0.25g of stool sample was transferred into the Power-Bead tubes using a sterile  
306 disposable wooden spatula (Lasec Laboratories, RSA). The sample was homogenized by gently  
307 vortexing the tubes for 10 s before adding 60 µL of the lysis buffer. This was then incubated for  
308 30 min. at 55°C prior to centrifugation at room temperature for 30 s at 10,000 x g. The  
309 supernatant from this step was transferred to sterile 2 mL tubes and 250 µL of inhibitor removal  
310 reagent was added to this. The samples were incubated on ice for 5 min., thereafter

311 approximately 1.2 mL of binding buffer was added. Next, 70% ethanol (500  $\mu$ L) was added and  
312 the contents precipitated by centrifugation at room temperature for 60 s at 10,000 x *g*. The DNA  
313 was eluted with 100  $\mu$ L filter-sterilised autoclaved Millipore water and quantified using the  
314 NanoDrop™ 2000/2000c Spectrophotometer (Thermo Scientific, Waltham, MA, USA). The  
315 quality of isolated DNA was confirmed by agarose gel electrophoresis, on 1% (w/v) agarose gel  
316 in 1 X TAE buffer (0.2% [w/v] Tris, 0.5% [v/v] acetic acid, 1% [v/v] 5 M EDTA [pH 8]) at 90  
317 Volts for 45 min. in a BioRad Sub-Cell® GT gel electrophoresis system with gel red visualising  
318 agent. The gel was visualised using the BioRad Gel Doc system and viewed with a UV Trans-  
319 illuminator.

#### 320 **ITS gene region amplification, sequencing and data processing**

321 The internal transcribed spacer (ITS) region was amplified using fungal-specific primers (60):  
322 ITS1F (5' -CTTGGTCATTTAGAGGAAGTAA-3') and ITS4 (5'-  
323 TCCTCCGCTTATTGATATGC-3') and the HotStarTaq Plus Master Kit (Qiagen, Valencia,  
324 CA). Amplicons from different samples were pooled to equimolar concentrations and purified of  
325 short fragments using Agencourt Ampure beads (Agencourt Bioscience Corporation, USA).  
326 Paired-end 2 x 250bp sequencing was performed on an Illumina MiSeq instrument (Illumina  
327 Inc., San Diego, CA, USA) at Mr DNA (Shallowater, TX 79363).

328 The resultant data were analysed using the Quantitative Insights into Microbial Ecology  
329 (QIIME2) software version 2018.8.0 (71). Demultiplexed sequences were assessed for quality  
330 and those shorter than 200 bp, with quality scores below 25, containing more than two  
331 ambiguous characters or more than one mismatch to the sample-specific barcode or the primer  
332 sequences, were excluded from further downstream analyses. Chimeric sequence detection and  
333 operation taxonomic unit (OTU) selection was performed at 97% sequence similarity using



334 USEARCH v11 (72). Taxonomies were assigned to each OTU using the UNITE (release 7\_99)  
335 databases for fungi (73). Singletons were excluded, and each sample was randomly subsampled  
336 (rarefied) to the same number of sequences per sample (17 980).

### 337 **Statistical analyses**

338 All statistical analyses were performed in R version 3.5.1 using R studio (74, 75). Alpha  
339 diversity indices (observed, Chao1, Shannon, and Simpson indices), together with rarefaction  
340 curves were calculated and visualized using the R packages “phyloseq” and “ggplot”. First, the  
341 Shapiro-Wilk’s test was applied to determine data distribution (76). Subsequently, the unpaired  
342 two-sample Wilcoxon rank sum test (77, 78) was applied to determine significant differences  
343 between the alpha diversity indices using the R packages “dplyr” version 0.4.3 and the “ggpubr”  
344 version 0.1.8. (79, 80). In these analyses, the rural or urban location was specified as a random  
345 factor.

346 The R packages “phyloseq” (81) and “microbiomeseq” (82) were used to calculate and visualize  
347 relative taxa abundance at phylum and class level. OTU abundance was transformed to relative  
348 abundance and taxa with relative abundance less than 0.1% were removed. The Wilcoxon rank  
349 sum test was applied to determine significant differences between taxa in the urban and rural  
350 samples. Whereas, the Kruskal-Wallis test (83) was applied to determine significant differences  
351 between taxa in the four sample types.

352 The local contribution to beta diversity (LCBD) was calculated according to (84). The LCBD  
353 describes the degree of uniqueness of a given sample in relation to the overall community  
354 composition. The taxa abundance was normalized to obtain the proportion of most abundant taxa

355 per sample. Location was used as the grouping variable and the Hellinger method was used for  
356 the dissimilarity coefficients calculation.

357 Pairwise similarities among samples were calculated using the Bray–Curtis index of similarity.  
358 The resulting matrix was represented visually in a nonmetric multidimensional scaling (NMDS)  
359 plot to observe community structure. Using the *vegan* package (85), a permutational  
360 multivariate analysis of variance (PERMANOVA) (86) based on 9999 permutations of the data,  
361 was performed to test whether differences between sample groupings in the NMDS ordinations  
362 were statistically significant. Microbial community similarities and the homogeneity of  
363 dispersion between the rural and urban sample groups were tested using the ANOSIM and  
364 ADONIS tests, respectively (87, 88).

365 The effect of the different recorded environmental factors on fungal community composition and  
366 structure was determined through redundancy analysis (RDA). First, the OTU-count data were  
367 Hellinger-transformed. The contribution of highly correlating OTUs ( $p$ -Value < 0.05) with  
368 redundancy axes was identified using the *envfit* function from the R package *vegan* (85). To  
369 measure the relationship of abundant taxa with measured anthropometric factors (age, BMI,  
370 height, and weight), a Spearman correlation analysis was done and visualized in the R package  
371 *microbiomeseq* (82).

372 Fungal-fungal relationships were interrogated using SparCC (89). Correlation was based on  
373 measuring the linear relationship between log transformed abundances. First, data were filtered  
374 to remove OTUs that had less than 2 reads on average. SparCC was used to generate true  
375 correlation coefficients from which pseudo  $p$ -values were calculated. The calculate pseudo  $p$ -  
376 values were false discovery rate (FDR) adjusted (90) and the correlation matrix was visualized  
377 using the “*corrplot*” function (91) in R.

378 Potential biomarker taxa which differed in abundance and occurrence between the two  
379 geographic groups were detected by linear discriminant analysis (LDA) effect size (LEfSe) (33).  
380 The LEfSe was calculated using the online Galaxy web application (92) with the Huttenhower  
381 lab's tool (<https://galaxyproject.org/learn/visualization/custom/lefse/>). First the nonparametric  
382 factorial Kruskal–Wallis sum rank tests ( $\alpha = 0.01$ ) was used to detect differential abundant  
383 features (at genera, family, class and phylum level) within the two geographic locations (rural  
384 and urban). The phylogenetic consistency was then tested using the pairwise Wilcoxon rank-sum  
385 tests ( $\alpha = 0.01$ ). Finally, the effect size of each differentially abundant feature was estimated  
386 using the LDA. The all-against-all classes were compared (most stringent) and a linear  
387 discriminant analysis score value of 2.0 was chosen as threshold for discriminative features.

388

### 389 **Consent for publication**

390 All participants provided consent for publication of study results of the collected biomaterials  
391 paired with anonymized information on age, sex, location, diet and other data.

392

### 393 **Availability of data and materials**

394 The sequence data generated in this study are available on the NCBI  
395 (<https://www.ncbi.nlm.nih.gov/>) under the following accession number: PRJNA589500.

### 396 **Competing interests**

397 The authors declare that they have no competing interests.

### 398 **Acknowledgements**

399 This research was supported by the South African Medical Research Foundation (TPM). MHK  
400 and KM received scholarships from the National Research Foundation. We wish to thank the  
401 Fulbright program for providing sabbatical support to TPM, JJ was funded by the Microbiomes  
402 in Transition (MinT) initiative at the Pacific Northwest National Laboratory in Richland, WA,  
403 USA. PNNL is operated for the DOE by Battelle Memorial Institute under Contract DE-AC05-  
404 76RL01830. We would like to thank all the volunteers for donating their data, time and samples  
405 to our research.

406

407 **Figure captions**

408 **Figure 1** Geographic locations and diversity estimates **a)** The three sampling locations in  
409 Gauteng (Pretoria) and Limpopo (Ha-ravele and Tshikombani) provinces of South Africa **b)** The  
410 differences in mycobiota species richness between the two locations, gender and age group and,  
411 **c)** The relative abundances of taxa at phylum and class levels within each location. The  
412 abundance of each taxon was calculated as the percentage of sequences per gender (RF = Rural  
413 female, RM = Rural male, UF = urban female and UM = Urban male) from each location for a  
414 given microbial group. The group designated as 'Unknown' encompasses unclassified sequences  
415 together with classes representing > 0.1% of the total sequences. The bar size represents the  
416 relative abundance of specific taxa in the particular group, with colours referring to taxa  
417 according to the legend.

418

419 **Figure 2** Overview of mycobiota structure and significant environmental drivers **a)** The non-  
420 metric multidimensional scaling (NMDS) plot based on Bray–Curtis dissimilarity and, **b)**  
421 Redundancy analysis (RDA) showing community structure in response to four selective  
422 variables. The filled shapes reflect fungal community composition in the different locations, with  
423 colours referring to location and the different explanatory variables according to the legend.

424

425 **Figure 3** The results of Linear discriminant analysis (LDA) effect size (LefSe) analysis of rural  
426 and urban gut mycobiota **a)** The cladogram shows the output of the LefSe algorithm, which  
427 identifies taxonomically consistent differences between rural (Ha-ravele and Tshikombani  
428 villages) and urban (Pretoria) fungal community members, respectively. Taxa with

429 nonsignificant differences are represented as yellow circles and the diameter of the circle is  
430 proportional to relative abundances **b)** The histogram of the LDA scores was computed for  
431 differentially abundant taxa between the rural and urban gut mycobiota. The bar size represents  
432 the effect of the size of specific taxa in the particular group at species level

433

434 **Figure 4** Correlations occurring between fungal taxa in **a)** rural and **b)** urban fungal mycobiota  
435 with  $P < 0.05$  after FDR adjustment. Red squares represent significant negative correlations and  
436 blue squares represent significant positive correlations. The darker colours represent stronger  
437 correlations and non-significant correlations have been excluded from the plot.

438

#### 439 **Supplemental Figure legend**

440 **Figure S1** Comparison of mycobiota between urban and rural participants a) Venn diagram  
441 showing the unique and shared phlotypes for samples collected from urban and rural  
442 participants. b) Rarefaction plot showing sequencing coverage. c) Taxa abundance data was  
443 normalised to obtain the proportion of most abundant taxa per sample. The diameter of the points  
444 at the bottom of the plot corresponds to the magnitude of the LCBD value for a particular  
445 sample. The bars correspond to taxa that are most abundant with the top taxa sharing a bigger  
446 portion of the bar for each sample.

447

## 448 References

- 449 1. Sogin ML, Morrison HG, Huber JA, Welch DM, Huse SM, Neal PR, Arrieta JM, Herndl GJ. 2006.  
450 Microbial diversity in the deep sea and the underexplored “rare biosphere”. *Proceedings of the*  
451 *National Academy of Sciences* 103:12115-12120.
- 452 2. Richard ML, Sokol H. 2019. The gut mycobiota: insights into analysis, environmental interactions  
453 and role in gastrointestinal diseases. *Nature Reviews Gastroenterology & Hepatology* 16:331-  
454 345.
- 455 3. Underhill DM, Iliev ID. 2014. The mycobiota: interactions between commensal fungi and the  
456 host immune system. *Nature Reviews Immunology* 14:405.
- 457 4. Oever Jt, Netea MG. 2014. The bacteriome–mycobiome interaction and antifungal host defense.  
458 *European journal of immunology* 44:3182-3191.
- 459 5. Huffnagle GB, Noverr MC. 2013. The emerging world of the fungal microbiome. *Trends in*  
460 *microbiology* 21:334-341.
- 461 6. Nash AK, Auchtung TA, Wong MC, Smith DP, Gesell JR, Ross MC, Stewart CJ, Metcalf GA, Muzny  
462 DM, Gibbs RA. 2017. The gut mycobiome of the Human Microbiome Project healthy cohort.  
463 *Microbiome* 5:153.
- 464 7. Hallen-Adams HE, Suhr MJ. 2017. Fungi in the healthy human gastrointestinal tract. *Virulence*  
465 8:352-358.
- 466 8. Rizzetto L, De Filippo C, Cavalieri D. 2014. Richness and diversity of mammalian fungal  
467 communities shape innate and adaptive immunity in health and disease. *European journal of*  
468 *immunology* 44:3166-3181.
- 469 9. Romani L. 2011. Immunity to fungal infections. *Nature Reviews Immunology* 11:275.
- 470 10. Fujimura KE, Sitarik AR, Havstad S, Lin DL, Levan S, Fadrosch D, Panzer AR, LaMere B, Rackaityte E,  
471 Lukacs NW. 2016. Neonatal gut microbiota associates with childhood multisensitized atopy and  
472 T cell differentiation. *Nature medicine* 22:1187.
- 473 11. Ott SJ, Kühbacher T, Musfeldt M, Rosenstiel P, Hellmig S, Rehman A, Drews O, Weichert W,  
474 Timmis KN, Schreiber S. 2008. Fungi and inflammatory bowel diseases: alterations of  
475 composition and diversity. *Scandinavian journal of gastroenterology* 43:831-841.
- 476 12. Sokol H, Leducq V, Aschard H, Pham H-P, Jegou S, Landman C, Cohen D, Liguori G, Bourrier A,  
477 Nion-Larmurier I. 2017. Fungal microbiota dysbiosis in IBD. *Gut* 66:1039-1048.
- 478 13. Iliev ID, Funari VA, Taylor KD, Nguyen Q, Reyes CN, Strom SP, Brown J, Becker CA, Fleshner PR,  
479 Dubinsky M. 2012. Interactions between commensal fungi and the C-type lectin receptor Dectin-  
480 1 influence colitis. *Science* 336:1314-1317.
- 481 14. Luan C, Xie L, Yang X, Miao H, Lv N, Zhang R, Xiao X, Hu Y, Liu Y, Wu N. 2015. Dysbiosis of fungal  
482 microbiota in the intestinal mucosa of patients with colorectal adenomas. *Scientific reports*  
483 5:7980.
- 484 15. Rodríguez MM, Pérez D, Chaves FJ, Esteve E, Marin-Garcia P, Xifra G, Vendrell J, Jové M,  
485 Pamplona R, Ricart W. 2015. Obesity changes the human gut mycobiome. *Scientific reports*  
486 5:14600.
- 487 16. Gewolb IH, Schwalbe RS, Taciak VL, Harrison TS, Panigrahi P. 1999. Stool microflora in extremely  
488 low birthweight infants. *Archives of Disease in Childhood-Fetal and Neonatal Edition* 80:F167-  
489 F173.
- 490 17. Strati F, Di Paola M, Stefanini I, Albanese D, Rizzetto L, Lionetti P, Calabrò A, Jousson O, Donati C,  
491 Cavalieri D. 2016. Age and gender affect the composition of fungal population of the human  
492 gastrointestinal tract. *Frontiers in microbiology* 7:1227.

- 493 18. Heisel T, Podgorski H, Staley CM, Knights D, Sadowsky MJ, Gale CA. 2015. Complementary  
494 amplicon-based genomic approaches for the study of fungal communities in humans. *PLoS One*  
495 10:e0116705.
- 496 19. Hoffmann C, Dollive S, Grunberg S, Chen J, Li H, Wu GD, Lewis JD, Bushman FD. 2013. Archaea  
497 and fungi of the human gut microbiome: correlations with diet and bacterial residents. *PLoS One*  
498 8:e66019.
- 499 20. Gouba N, Raoult D, Drancourt M. 2013. Plant and fungal diversity in gut microbiota as revealed  
500 by molecular and culture investigations. *PloS one* 8:e59474.
- 501 21. Kowalewska B, Zorena K, Szmigiero-Kawko M, Wąż P, Myśliwiec M. 2016. Higher diversity in  
502 fungal species discriminates children with type 1 diabetes mellitus from healthy control. *Patient*  
503 preference and adherence 10:591.
- 504 22. Gouba N, Raoult D, Drancourt M. 2014. Gut microeukaryotes during anorexia nervosa: a case  
505 report. *BMC research notes* 7:33.
- 506 23. Zhang E, Tanaka T, Tajima M, Tsuboi R, Nishikawa A, Sugita T. 2011. Characterization of the skin  
507 fungal microbiota in patients with atopic dermatitis and in healthy subjects. *Microbiology and*  
508 *immunology* 55:625-632.
- 509 24. Nguyen LD, Viscogliosi E, Delhaes L. 2015. The lung mycobiome: an emerging field of the human  
510 respiratory microbiome. *Frontiers in microbiology* 6:89.
- 511 25. Hamad I, Sokhna C, Raoult D, Bittar F. 2012. Molecular detection of eukaryotes in a single  
512 human stool sample from Senegal. *PloS one* 7:e40888.
- 513 26. Nam Y-D, Chang H-W, Kim K-H, Roh SW, Kim M-S, Jung M-J, Lee S-W, Kim J-Y, Yoon J-H, Bae J-W.  
514 2008. Bacterial, archaeal, and eukaryal diversity in the intestines of Korean people. *The Journal*  
515 *of Microbiology* 46:491-501.
- 516 27. Hamad I, Raoult D, Bittar F. 2016. Repertory of eukaryotes (eukaryome) in the human  
517 gastrointestinal tract: taxonomy and detection methods. *Parasite immunology* 38:12-36.
- 518 28. Xu Z, Knight R. 2015. Dietary effects on human gut microbiome diversity. *Br J Nutr* 113 Suppl:S1-  
519 5.
- 520 29. Wang WL, Xu SY, Ren ZG, Tao L, Jiang JW, Zheng SS. 2015. Application of metagenomics in the  
521 human gut microbiome. *World J Gastroenterol* 21:803-14.
- 522 30. Suhr MJ, Banjara N, Hallen-Adams HE. 2016. Sequence-based methods for detecting and  
523 evaluating the human gut mycobiome. *Letters in applied microbiology* 62:209-215.
- 524 31. Raimondi S, Amaretti A, Gozzoli C, Simone M, Righini L, Candelieri F, Brun P, Ardizzoni A,  
525 Colombari B, Paulone S. 2019. Longitudinal survey of fungi in the human gut: ITS profiling,  
526 phenotyping and colonization. *Frontiers in microbiology* 10:1575.
- 527 32. Hallen-Adams HE. 2017. Fungi in the healthy human gastrointestinal tract. *Virulence* 8:352.
- 528 33. Segata N, Izard J, Waldron L, Gevers D, Miropolsky L, Garrett WS, Huttenhower C. 2011.  
529 Metagenomic biomarker discovery and explanation. *Genome biology* 12:R60.
- 530 34. Hallen-Adams HE. 2015. Fungi inhabiting the healthy human gastrointestinal tract: a diverse and  
531 dynamic community. *Fungal Ecology* 15:9.
- 532 35. Wang D, Rui Y, Ding K, Cui X, Hao Y, Tang L, Pang Z, Zhang B, Zhou S, Wang K. 2018. Precipitation  
533 drives the biogeographic distribution of soil fungal community in Inner Mongolian temperate  
534 grasslands. *Journal of soils and sediments* 18:222-228.
- 535 36. Summerell BA, Laurence MH, Liew EC, Leslie JF. 2010. Biogeography and phylogeography of  
536 *Fusarium*: a review. *Fungal Diversity* 44:3-13.
- 537 37. Kolecka A, Khayhan K, Groenewald M, Theelen B, Arabatzis M, Velegraki A, Kostrzewa M, Mares  
538 M, Taj-Aldeen SJ, Boekhout T. 2013. Identification of medically relevant species of arthroconidial  
539 yeasts by use of matrix-assisted laser desorption ionization–time of flight mass spectrometry.  
540 *Journal of clinical microbiology* 51:2491-2500.



- 541 38. Kurtzman CP. 2011. *Hyphopichia* von Arx & van der Walt (1976), p 435-438, *The Yeasts*. Elsevier.
- 542 39. Schifferdecker AJ, Dashko S, Ishchuk OP, Piškur J. 2014. The wine and beer yeast *Dekkera*  
543 *bruxellensis*. *Yeast* 31:323-332.
- 544 40. Fadda ME, Cosentino S, Deplano M, Palmas F. 2001. Yeast populations in Sardinian feta cheese.  
545 *International Journal of Food Microbiology* 69:153-156.
- 546 41. Meroth CB, Hammes WP, Hertel C. 2003. Identification and population dynamics of yeasts in  
547 sourdough fermentation processes by PCR-denaturing gradient gel electrophoresis. *Appl Environ*  
548 *Microbiol* 69:7453-7461.
- 549 42. Into P, Pontes A, Sampaio JP, Limtong S. 2020. Yeast Diversity Associated with the Phylloplane of  
550 Corn Plants Cultivated in Thailand. *Microorganisms* 8:80.
- 551 43. Landell M, Brandão L, Barbosa A, Ramos J, Safar S, Gomes F, Sousa F, Morais P, Broetto L,  
552 Leoncini O, Ribeiro J, Fungsin B, Takashima M, Nakase T, Vainstein M, Fell J, Scorzetti G, Vishniac  
553 H, Valente P. 2014. *Hannaella pagnoccae* sp. nov., a tremellaceous yeast species isolated from  
554 plants and soil. *International journal of systematic and evolutionary microbiology* 64.
- 555 44. Yatsunencko T, Rey FE, Manary MJ, Trehan I, Dominguez-Bello MG, Contreras M, Magris M,  
556 Hidalgo G, Baldassano RN, Anokhin AP. 2012. Human gut microbiome viewed across age and  
557 geography. *nature* 486:222.
- 558 45. Dominguez-Bello MG, Costello EK, Contreras M, Magris M, Hidalgo G, Fierer N, Knight R. 2010.  
559 Delivery mode shapes the acquisition and structure of the initial microbiota across multiple  
560 body habitats in newborns. *Proceedings of the National Academy of Sciences* 107:11971-11975.
- 561 46. Wu GD, Chen J, Hoffmann C, Bittinger K, Chen Y-Y, Keilbaugh SA, Bewtra M, Knights D, Walters  
562 WA, Knight R. 2011. Linking long-term dietary patterns with gut microbial enterotypes. *Science*  
563 334:105-108.
- 564 47. Suhr MJ. 2016. Sequencebased methods for detecting and evaluating the human gut  
565 mycobiome. *Letters in Applied Microbiology* 62:209.
- 566 48. Capurso G, Lahner E. 2017. The interaction between smoking, alcohol and the gut microbiome.  
567 *Best practice & research Clinical gastroenterology* 31:579-588.
- 568 49. Biedermann L, Brülisauer K, Zeitz J, Frei P, Scharl M, Vavricka SR, Fried M, Loessner MJ, Rogler G,  
569 Schuppler M. 2014. Smoking cessation alters intestinal microbiota: insights from quantitative  
570 investigations on human fecal samples using FISH. *Inflammatory bowel diseases* 20:1496-1501.
- 571 50. Allais L, Kerckhof FM, Verschuere S, Bracke KR, De Smet R, Laukens D, Van den Abbeele P, De  
572 Vos M, Boon N, Brusselle GG. 2016. Chronic cigarette smoke exposure induces microbial and  
573 inflammatory shifts and mucin changes in the murine gut. *Environmental microbiology* 18:1352-  
574 1363.
- 575 51. Biedermann L, Zeitz J, Mwinyi J, Sutter-Minder E, Rehman A, Ott SJ, Steurer-Stey C, Frei A, Frei P,  
576 Scharl M. 2013. Smoking cessation induces profound changes in the composition of the  
577 intestinal microbiota in humans. *PloS one* 8:e59260.
- 578 52. Rogers MA, Greene MT, Saint S, Chenoweth CE, Malani PN, Trivedi I, Aronoff DM. 2012. Higher  
579 rates of *Clostridium difficile* infection among smokers. *Plos one* 7:e42091.
- 580 53. Tomoda K, Kubo K, Asahara T, Andoh A, Nomoto K, Nishii Y, Yamamoto Y, Yoshikawa M, Kimura  
581 H. 2011. Cigarette smoke decreases organic acids levels and population of bifidobacterium in  
582 the caecum of rats. *The Journal of toxicological sciences* 36:261-266.
- 583 54. Hoarau G, Mukherjee P, Gower-Rousseau C, Hager C, Chandra J, Retuerto M, Neut C, Vermeire  
584 S, Clemente J, Colombel J-F. 2016. Bacteriome and mycobiome interactions underscore  
585 microbial dysbiosis in familial Crohn's disease. *MBio* 7:e01250-16.
- 586 55. Dupuy AK, David MS, Li L, Heider TN, Peterson JD, Montano EA, Dongari-Bagtzoglou A, Diaz PI,  
587 Strausbaugh LD. 2014. Redefining the human oral mycobiome with improved practices in

- 588 amplicon-based taxonomy: discovery of *Malassezia* as a prominent commensal. *PLoS One*  
589 9:e90899.
- 590 56. Mukherjee PK, Chandra J, Retuerto M, Sikaroodi M, Brown RE, Jurevic R, Salata RA, Lederman  
591 MM, Gillevet PM, Ghannoum MA. 2014. Oral mycobiome analysis of HIV-infected patients:  
592 identification of *Pichia* as an antagonist of opportunistic fungi. *PLoS pathogens* 10:e1003996.
- 593 57. Rodríguez JM, Murphy K, Stanton C, Ross RP, Kober OI, Juge N, Avershina E, Rudi K, Narbad A,  
594 Jenmalm MC. 2015. The composition of the gut microbiota throughout life, with an emphasis on  
595 early life. *Microbial ecology in health and disease* 26:26050.
- 596 58. Strati F, Cavalieri D, Albanese D, De Felice C, Donati C, Hayek J, Jousson O, Leoncini S, Pindo M,  
597 Renzi D. 2016. Altered gut microbiota in Rett syndrome. *Microbiome* 4:41.
- 598 59. Gardes M, Bruns TD. 1993. ITS primers with enhanced specificity for basidiomycetes-application  
599 to the identification of mycorrhizae and rusts. *Molecular ecology* 2:113-118.
- 600 60. White TJ, Bruns T, Lee S, Taylor J. 1990. Amplification and direct sequencing of fungal ribosomal  
601 RNA genes for phylogenetics. *PCR protocols: a guide to methods and applications* 18:315-322.
- 602 61. Raimondi S, Amaretti A, Gozzoli C, Simone M, Righini L, Candelieri F, Brun P, Ardizzoni A,  
603 Colombari B, Paulone S, Castagliuolo I, Cavalieri D, Blasi E, Rossi M, Peppoloni S. 2019.  
604 Longitudinal Survey of Fungi in the Human Gut: ITS Profiling, Phenotyping, and Colonization.  
605 *Frontiers in Microbiology* 10.
- 606 62. Calderone RA, Clancy CJ. 2011. *Candida and candidiasis*. American Society for Microbiology  
607 Press.
- 608 63. Silva S, Negri M, Henriques M, Oliveira R, Williams DW, Azeredo J. 2012. *Candida glabrata*,  
609 *Candida parapsilosis* and *Candida tropicalis*: biology, epidemiology, pathogenicity and antifungal  
610 resistance. *FEMS microbiology reviews* 36:288-305.
- 611 64. Ghannoum MA, Jurevic RJ, Mukherjee PK, Cui F, Sikaroodi M, Naqvi A, Gillevet PM. 2010.  
612 Characterization of the oral fungal microbiome (mycobiome) in healthy individuals. *PLoS*  
613 *pathogens* 6:e1000713.
- 614 65. Drell T, Lillsaar T, Tummeleht L, Simm J, Aaspõllu A, Väin E, Saarma I, Salumets A, Donders GG,  
615 Metsis M. 2013. Characterization of the vaginal micro-and mycobiome in asymptomatic  
616 reproductive-age Estonian women. *PloS one* 8:e54379.
- 617 66. Findley K, Oh J, Yang J, Conlan S, Deming C, Meyer JA, Schoenfeld D, Nomicos E, Park M,  
618 Sequencing NISCC. 2013. Topographic diversity of fungal and bacterial communities in human  
619 skin. *Nature* 498:367.
- 620 67. Leung MH, Chan KC, Lee PK. 2016. Skin fungal community and its correlation with bacterial  
621 community of urban Chinese individuals. *Microbiome* 4:46.
- 622 68. Moran G, Coleman D, Sullivan D. 2012. An introduction to the medically important *Candida*  
623 species, p 11-25, *Candida and Candidiasis, Second Edition*. American Society of Microbiology.
- 624 69. Saleh HA, Moawad AA, El-Hariri M, Refai MK. 2011. Prevalence of yeasts in human, animals and  
625 soil sample at El-Fayoum Governorate in Egypt. *Int J Microbiol Res* 2:233-239.
- 626 70. Vogel C, Rogerson A, Schatz S, Laubach H, Tallman A, Fell J. 2007. Prevalence of yeasts in beach  
627 sand at three bathing beaches in South Florida. *Water research* 41:1915-1920.
- 628 71. Bolyen E, Rideout JR, Dillon MR, Bokulich NA, Abnet C, Al-Ghalith GA, Alexander H, Alm EJ,  
629 Arumugam M, Asnicar F. 2018. QIIME 2: Reproducible, interactive, scalable, and extensible  
630 microbiome data science. *PeerJ Preprints*,
- 631 72. Edgar RC. 2010. Search and clustering orders of magnitude faster than BLAST. *Bioinformatics*  
632 26:2460-2461.
- 633 73. Kõljalg U, Larsson KH, Abarenkov K, Nilsson RH, Alexander IJ, Eberhardt U, Erland S, Høiland K,  
634 Kjølner R, Larsson E. 2005. UNITE: a database providing web-based methods for the molecular  
635 identification of ectomycorrhizal fungi. *New Phytologist* 166:1063-1068.

- 636 74. RDevelopmentCoreTeam. 2018. R: A Language and Environment for Statistical Computing: A  
637 Graduate Course in Probability. R Foundation for Statistical Computing, Vienna, Austria.
- 638 75. Wickham H, Wickham MH. 2007. The ggplot package.
- 639 76. Villasenor Alva JA, Estrada EG. 2009. A generalization of Shapiro–Wilk's test for multivariate  
640 normality. *Communications in Statistics—Theory and Methods* 38:1870-1883.
- 641 77. Mann HB, Whitney DR. 1947. On a test of whether one of two random variables is stochastically  
642 larger than the other. *The annals of mathematical statistics*:50-60.
- 643 78. Wilcoxon F. 1945. Individual comparisons by ranking methods. *Biometrics bulletin* 1:80-83.
- 644 79. Wickham H, Francois R, Henry L, Müller K. 2015. dplyr: A Grammar of Data Manipulation. R  
645 package version 0.4. 3. R Found Stat Comput, Vienna [https://CRAN](https://CRAN.R-project.org/package=dplyr)  
646 dplyr.
- 647 80. Kassambara A. 2018. ggpubr: 'ggplot2' Based Publication Ready Plots. R package version 0.1. 8.
- 648 81. McMurdie PJ, Holmes S. 2013. phyloseq: an R package for reproducible interactive analysis and  
649 graphics of microbiome census data. *PLoS one* 8:e61217.
- 650 82. Ssekagiri A, Sloan W, Ijaz U. microbiomeSeq: an R package for microbial community analysis in  
651 an environmental context, p. *In* (ed),
- 652 83. Breslow N. 1970. A generalized Kruskal-Wallis test for comparing K samples subject to unequal  
653 patterns of censorship. *Biometrika* 57:579-594.
- 654 84. Legendre P, De Cáceres M. 2013. Beta diversity as the variance of community data: dissimilarity  
655 coefficients and partitioning. *Ecology letters* 16:951-963.
- 656 85. Oksanen J, Blanchet FG, Kindt R, Legendre P, O'hara R, Simpson GL, Solymos P, Stevens MHH,  
657 Wagner H. 2010. Vegan: community ecology package. R package version 1.17-4. [http://cran](http://cran.r-project.org)  
658 r-project org> Acesso em 23:2010.
- 659 86. Anderson MJ. 2001. A new method for non-parametric multivariate analysis of variance. *Austral*  
660 *ecology* 26:32-46.
- 661 87. Gray J, Aschan M, Carr M, Clarke K, Green R, Pearson T, Rosenberg R, Warwick R. 1988. Analysis  
662 of community attributes of the benthic macrofauna of Frierfjord/Langesundfjord and in a  
663 mesocosm experiment. *Marine Ecology Progress Series* 46:151-165.
- 664 88. Anderson MJ, Walsh DC. 2013. PERMANOVA, ANOSIM, and the Mantel test in the face of  
665 heterogeneous dispersions: what null hypothesis are you testing? *Ecological monographs*  
666 83:557-574.
- 667 89. Friedman J, Alm EJ. 2012. Inferring correlation networks from genomic survey data. *PLoS*  
668 *computational biology* 8:e1002687.
- 669 90. Benjamini Y, Hochberg Y. 1995. Controlling the false discovery rate: a practical and powerful  
670 approach to multiple testing. *Journal of the Royal statistical society: series B (Methodological)*  
671 57:289-300.
- 672 91. Wei T, Simko V, Levy M, Xie Y, Jin Y, Zemla J. 2017. Package 'corrplot'. *Statistician* 56:316-324.
- 673 92. Blankenberg D, Kuster GV, Coraor N, Ananda G, Lazarus R, Mangan M, Nekrutenko A, Taylor J.  
674 2010. Galaxy: a web-based genome analysis tool for experimentalists. *Current protocols in*  
675 *molecular biology* 89:19.10. 1-19.10. 21.

676

**a**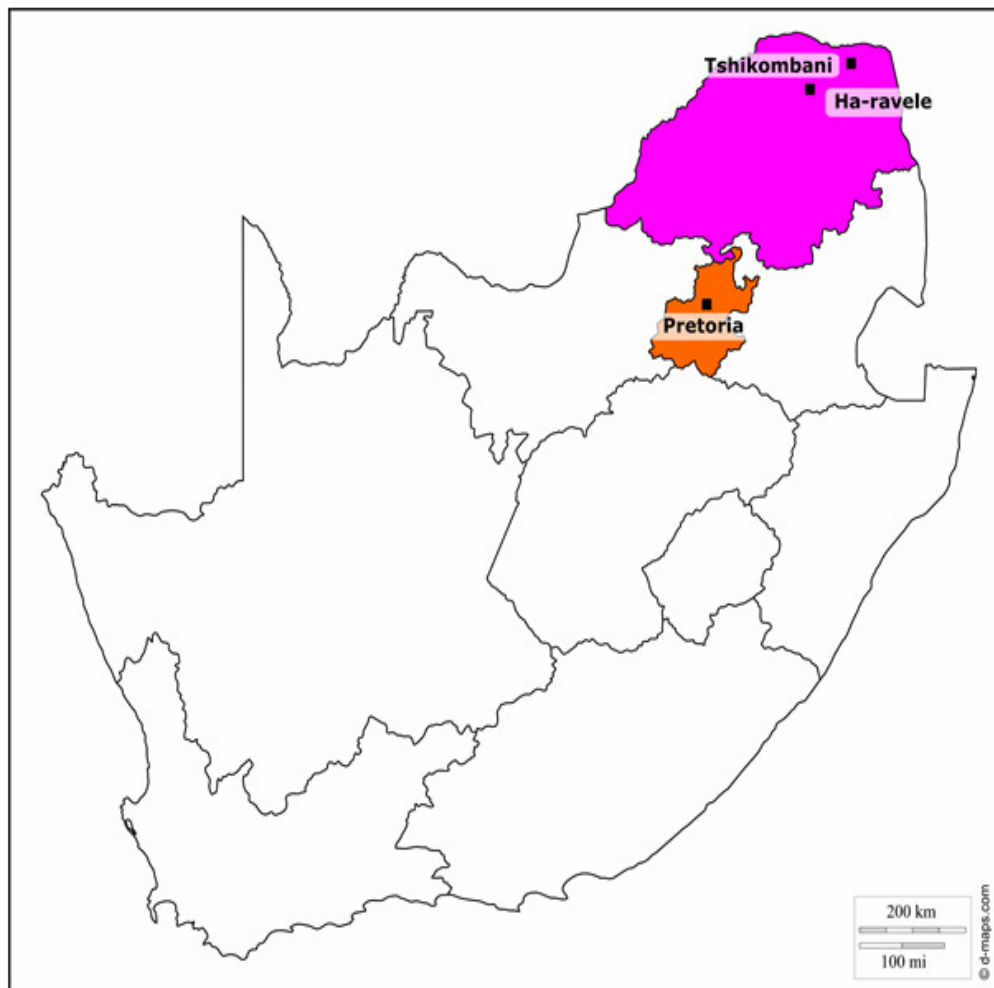**b**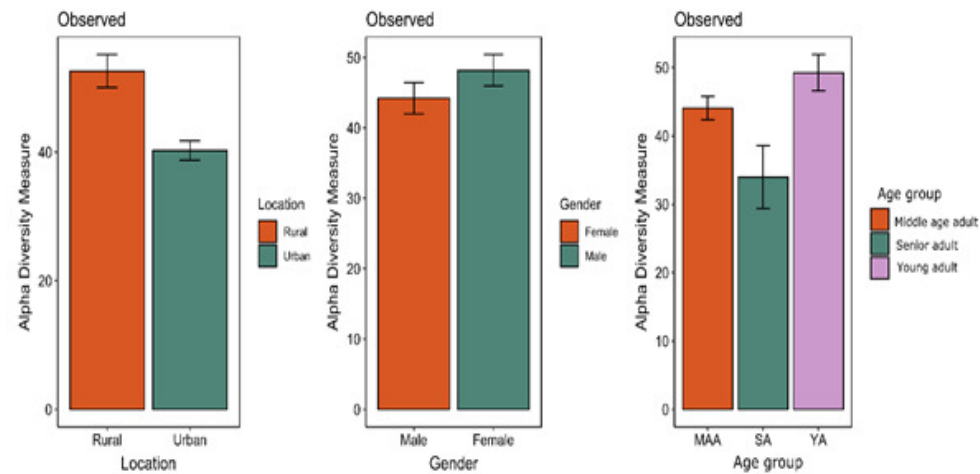**c**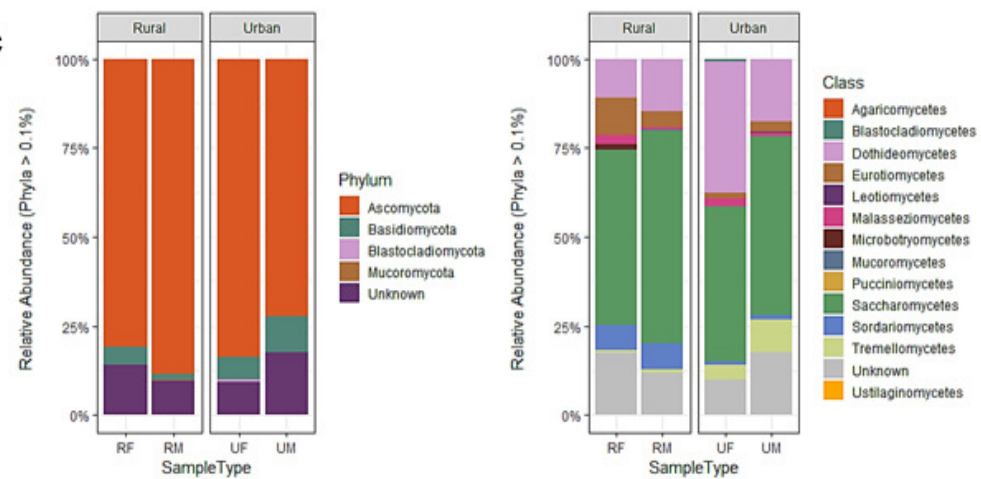

**a**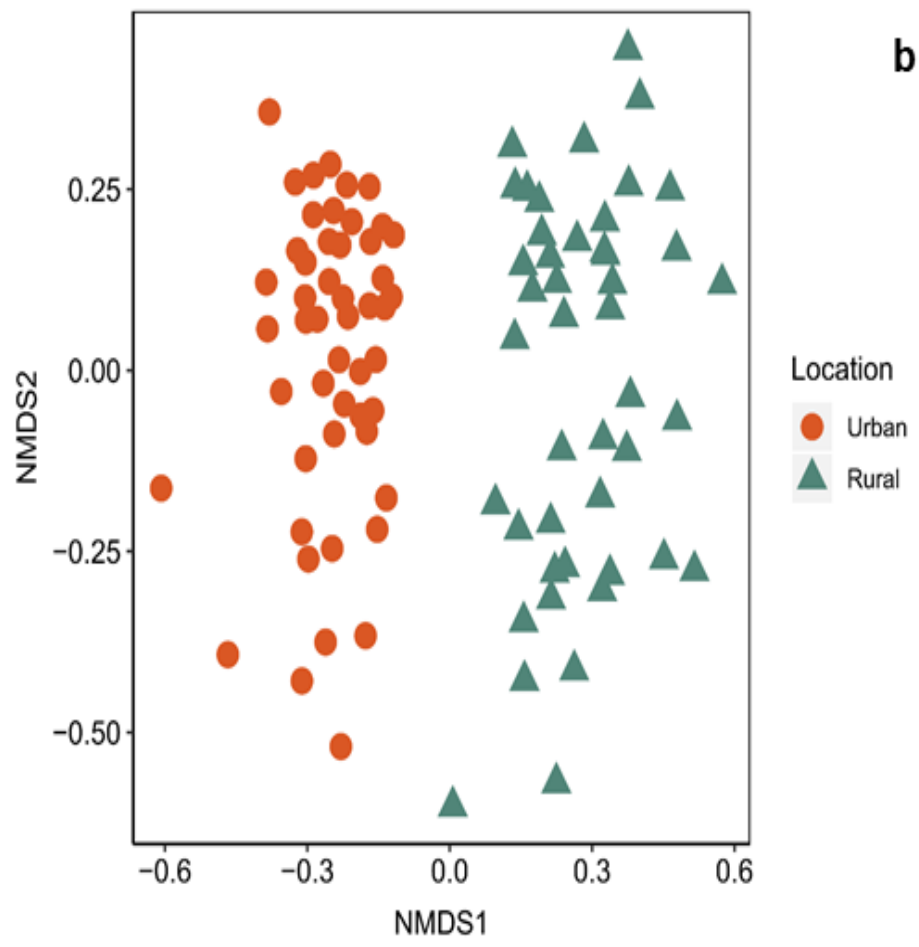**b**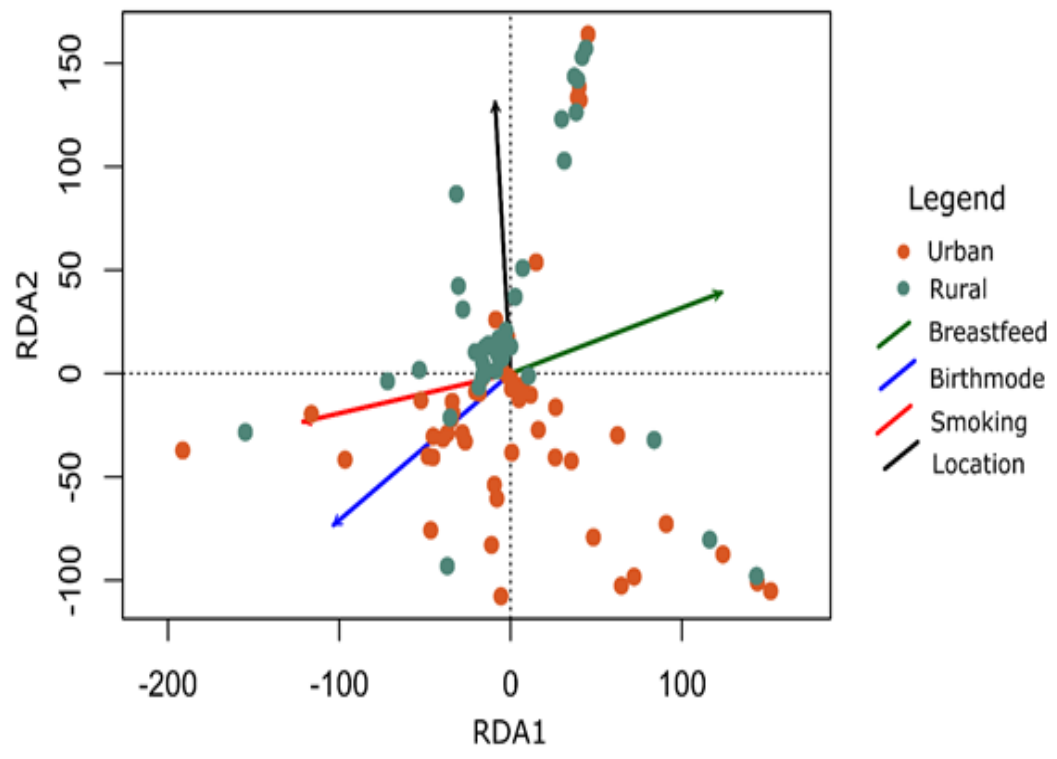



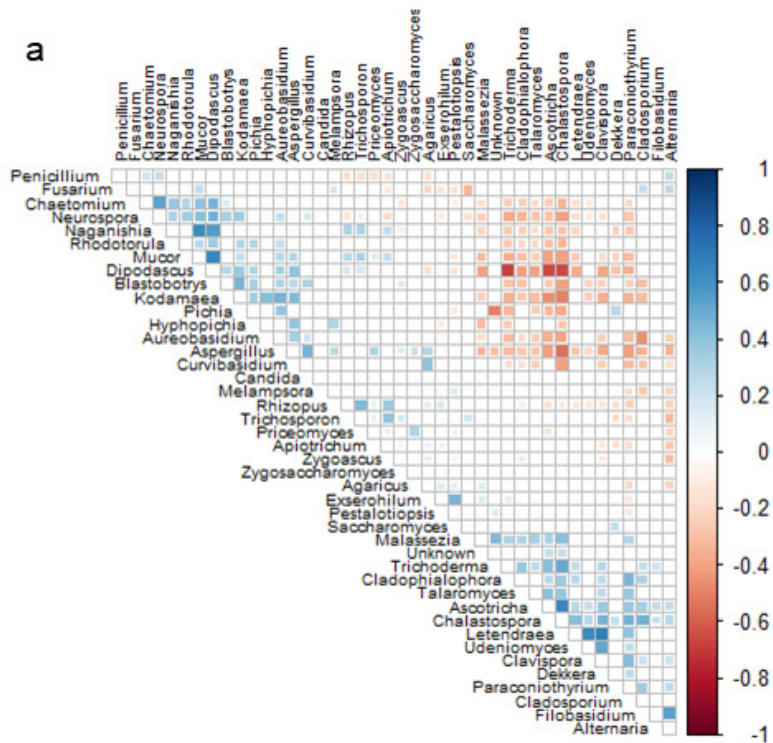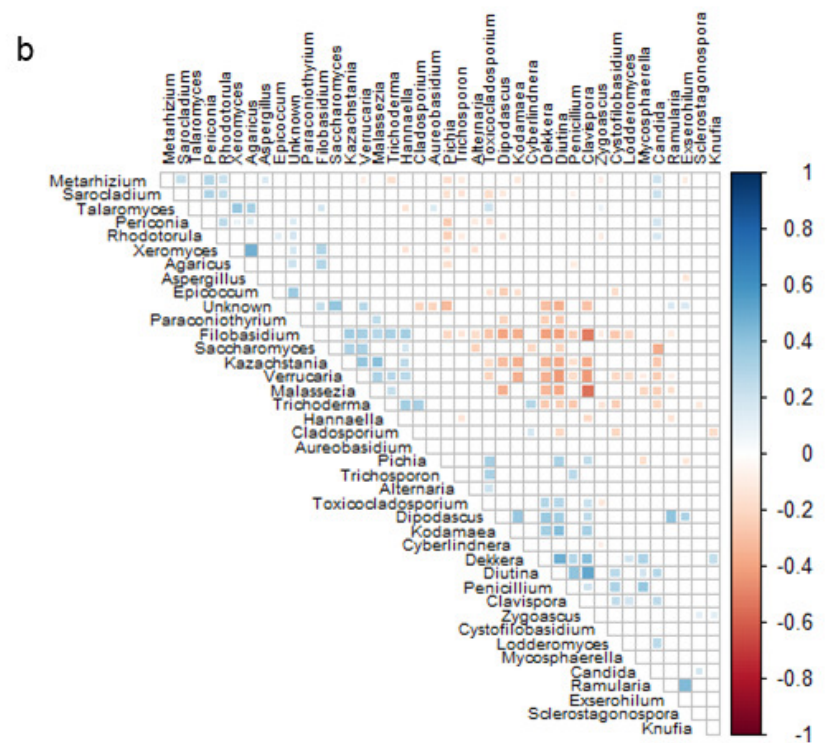

Source: https://biorxiv.org/content/10.1101/2020.03.19.999656v1.full.pdf
